# Supplementary material
Source: PubMed Central journal article supplement (PMC3728901)
Supplement: NIHMS491185-supplement-Supplement_1.pdf [file NIHMS491185-supplement-Supplement_1.pdf]

**Supplemental Figure 1. Weighted Kappa statistic for blood smear and LDR-FMA concordance.** Counts were weighted to adjust for the accuracy of identifying species combinations between the two diagnostic methods. A weight of 1.00 was applied when the diagnostic methods were in 100% agreement in detecting a single species infection, double, triple, or quadruple infections, or the absence of infection. Weights of 0.75, 0.50 and 0.25 were applied when the diagnostic methods concurred on 3/4, 2/4, 1/4 species in a sample, respectively.

|         |      | Blood Smear |      |      |      |      |      |      |      |      |      |      |      |      |      |      |      |
|---------|------|-------------|------|------|------|------|------|------|------|------|------|------|------|------|------|------|------|
|         |      | F           | V    | M    | O    | FV   | FM   | FO   | VM   | VO   | MO   | FVM  | FVO  | FMO  | VMO  | FVMO | NEG  |
| LDR-FMA | F    | 1.00        | 0.50 | 0.50 | 0.50 | 0.75 | 0.75 | 0.75 | 0.25 | 0.25 | 0.25 | 0.50 | 0.50 | 0.50 | 0    | 0.25 | 0.75 |
|         | V    | 0.50        | 1.00 | 0.50 | 0.50 | 0.75 | 0.25 | 0.25 | 0.75 | 0.75 | 0.25 | 0.50 | 0.50 | 0    | 0.50 | 0.25 | 0.75 |
|         | M    | 0.50        | 0.50 | 1.00 | 0.50 | 0.25 | 0.75 | 0.25 | 0.75 | 0.25 | 0.75 | 0.50 | 0    | 0.50 | 0.50 | 0.25 | 0.75 |
|         | O    | 0.50        | 0.50 | 0.50 | 1.00 | 0.25 | 0.25 | 0.75 | 0.25 | 0.75 | 0.75 | 0    | 0.50 | 0.50 | 0.50 | 0.25 | 0.75 |
|         | FV   | 0.75        | 0.75 | 0.25 | 0.25 | 1.00 | 0.50 | 0.50 | 0.50 | 0.50 | 0    | 0.75 | 0.75 | 0.25 | 0.25 | 0.50 | 0.50 |
|         | FM   | 0.75        | 0.25 | 0.75 | 0.25 | 0.50 | 1.00 | 0.50 | 0.50 | 0    | 0.50 | 0.75 | 0.25 | 0.75 | 0.25 | 0.50 | 0.50 |
|         | FO   | 0.75        | 0.25 | 0.25 | 0.75 | 0.50 | 0.50 | 1.00 | 0    | 0.50 | 0.50 | 0.25 | 0.75 | 0.75 | 0.25 | 0.50 | 0.50 |
|         | VM   | 0.25        | 0.75 | 0.75 | 0.25 | 0.50 | 0.50 | 0    | 1.00 | 0.50 | 0.50 | 0.75 | 0.25 | 0.25 | 0.75 | 0.50 | 0.50 |
|         | VO   | 0.25        | 0.75 | 0.25 | 0.75 | 0.50 | 0    | 0.50 | 0.50 | 1.00 | 0.50 | 0.25 | 0.75 | 0.25 | 0.75 | 0.50 | 0.50 |
|         | MO   | 0.25        | 0.25 | 0.75 | 0.75 | 0    | 0.50 | 0.50 | 0.50 | 0.50 | 1.00 | 0.25 | 0.25 | 0.75 | 0.75 | 0.50 | 0.50 |
|         | FVM  | 0.50        | 0.50 | 0.50 | 0    | 0.75 | 0.75 | 0.25 | 0.75 | 0.25 | 0.25 | 1.00 | 0.50 | 0.50 | 0.50 | 0.75 | 0.25 |
|         | FVO  | 0.50        | 0.50 | 0    | 0.50 | 0.75 | 0.25 | 0.75 | 0.25 | 0.75 | 0.25 | 0.50 | 1.00 | 0.50 | 0.50 | 0.75 | 0.25 |
|         | FMO  | 0.50        | 0    | 0.50 | 0.50 | 0.25 | 0.75 | 0.75 | 0.25 | 0.25 | 0.75 | 0.50 | 0.50 | 1.00 | 0.50 | 0.75 | 0.25 |
|         | VMO  | 0           | 0.50 | 0.50 | 0.50 | 0.25 | 0.25 | 0.25 | 0.75 | 0.75 | 0.75 | 0.50 | 0.50 | 0.50 | 1.00 | 0.75 | 0.25 |
|         | FVMO | 0.25        | 0.25 | 0.25 | 0.25 | 0.50 | 0.50 | 0.50 | 0.50 | 0.50 | 0.50 | 0.75 | 0.75 | 0.75 | 0.75 | 1.00 | 0    |
|         | NEG  | 0.75        | 0.75 | 0.75 | 0.75 | 0.50 | 0.50 | 0.50 | 0.50 | 0.50 | 0.50 | 0.25 | 0.25 | 0.25 | 0.25 | 0    | 1.00 |
