# Supplementary material
Source: PubMed Central journal article supplement (PMC3728901)
Supplement: NIHMS491185-supplement-Supplement_2.pdf [file NIHMS491185-supplement-Supplement_2.pdf]

**Supplemental Table 1. Concordance between blood smear microscopy and LDR-FMA**

| Concordance | LDR-FMA | Blood Smear | Count |    |
|-------------|---------|-------------|-------|----|
| 100%        | F       | F           | 121   |    |
|             | V       | V           | 61    |    |
|             | M       | M           | 9     |    |
|             | FV      | FV          | 9     |    |
|             | FM      | FM          | 2     |    |
| 75%         | NEG     | NEG         | 468   |    |
|             | F       | FV          | 1     |    |
|             | F       | FM          | 2     |    |
|             | F       | NEG         | 94    |    |
|             | V       | FV          | 3     |    |
|             | V       | VM          | 1     |    |
|             | V       | NEG         | 91    |    |
|             | M       | NEG         | 30    |    |
|             | O       | NEG         | 13    |    |
|             | FV      | F           | 23    |    |
|             | FV      | V           | 17    |    |
|             | FM      | F           | 12    |    |
|             | FM      | M           | 8     |    |
|             | FO      | F           | 4     |    |
|             | VM      | V           | 3     |    |
|             | VM      | M           | 5     |    |
|             | VO      | V           | 4     |    |
|             | MO      | M           | 1     |    |
|             | FVM     | FV          | 3     |    |
|             | FVM     | FM          | 1     |    |
|             | FVM     | VM          | 1     |    |
|             | FVO     | FV          | 1     |    |
|             | NEG     | F           | 26    |    |
|             | NEG     | V           | 24    |    |
|             | NEG     | M           | 4     |    |
|             | NEG     | O           | 1     |    |
|             | 50%     | F           | V     | 6  |
|             |         | V           | F     | 13 |
|             |         | V           | M     | 5  |
|             |         | M           | F     | 4  |
|             |         | M           | V     | 3  |
|             |         | O           | V     | 1  |
|             |         | O           | M     | 1  |
| FV          |         | NEG         | 20    |    |
| FM          |         | NEG         | 10    |    |
| FO          |         | FV          | 2     |    |
| FO          |         | NEG         | 7     |    |
| VM          |         | NEG         | 8     |    |
| VO          |         | NEG         | 5     |    |
| MO          |         | NEG         | 3     |    |
| FVM         |         | F           | 5     |    |
| FVM         |         | V           | 7     |    |
| FVM         |         | M           | 4     |    |
| FVO         |         | F           | 3     |    |
| FVO         |         | V           | 1     |    |
| FMO         |         | F           | 1     |    |
| FVMO        |         | FV          | 1     |    |
| NEG         |         | VO          | 1     |    |
| 25%         |         | FV          | M     | 2  |
|             |         | FV          | O     | 1  |
|             |         | VM          | F     | 1  |
|             |         | FVM         | NEG   | 7  |
|             |         | FMO         | NEG   | 3  |
|             | VMO     | NEG         | 4     |    |
|             | FVMO    | F           | 5     |    |
|             | FVMO    | M           | 1     |    |
| 0%          | FVMO    | NEG         | 4     |    |

**Supplemental Table 1 legend** - F = *P. falciparum*. V = *P. vivax*. M = *P. malariae*. O = *P. ovale*. NEG = non-infected. Concordance between blood smear microscopy and LDR-FMA for the detection of *Plasmodium* species was assessed (n = 1182) by counting the number of tests that were in complete agreement divided by the total number of tests. Weighted Kappa ( $K_w$ ) scores were calculated for all 16 possible combinations of *Plasmodium* species infected samples (single, double, triple, and quadruple species) and non-infected samples. Counts for 100% concordance between blood smear and LDR-FMA were multiplied by 1; by 0.75 if 3 of 4 tests were concordant (e.g. LDR FMA FVM-positive:O-negative vs blood smear FV-positive:MO-negative); by 0.50 if 2 of 4 tests were concordant; by 0.25 if 1 of 4 tests were concordant. Sensitivity, specificity and  $K_w$  calculations were performed using SAS.
